# Supplementary material for: Gender-Specific Risk Factors and Comorbidities of Bothersome Tinnitus
Source: PubMed Central journal article supplement (PMC7539146; doi:10.3389/fnins.2020.00706), 2020-09-23

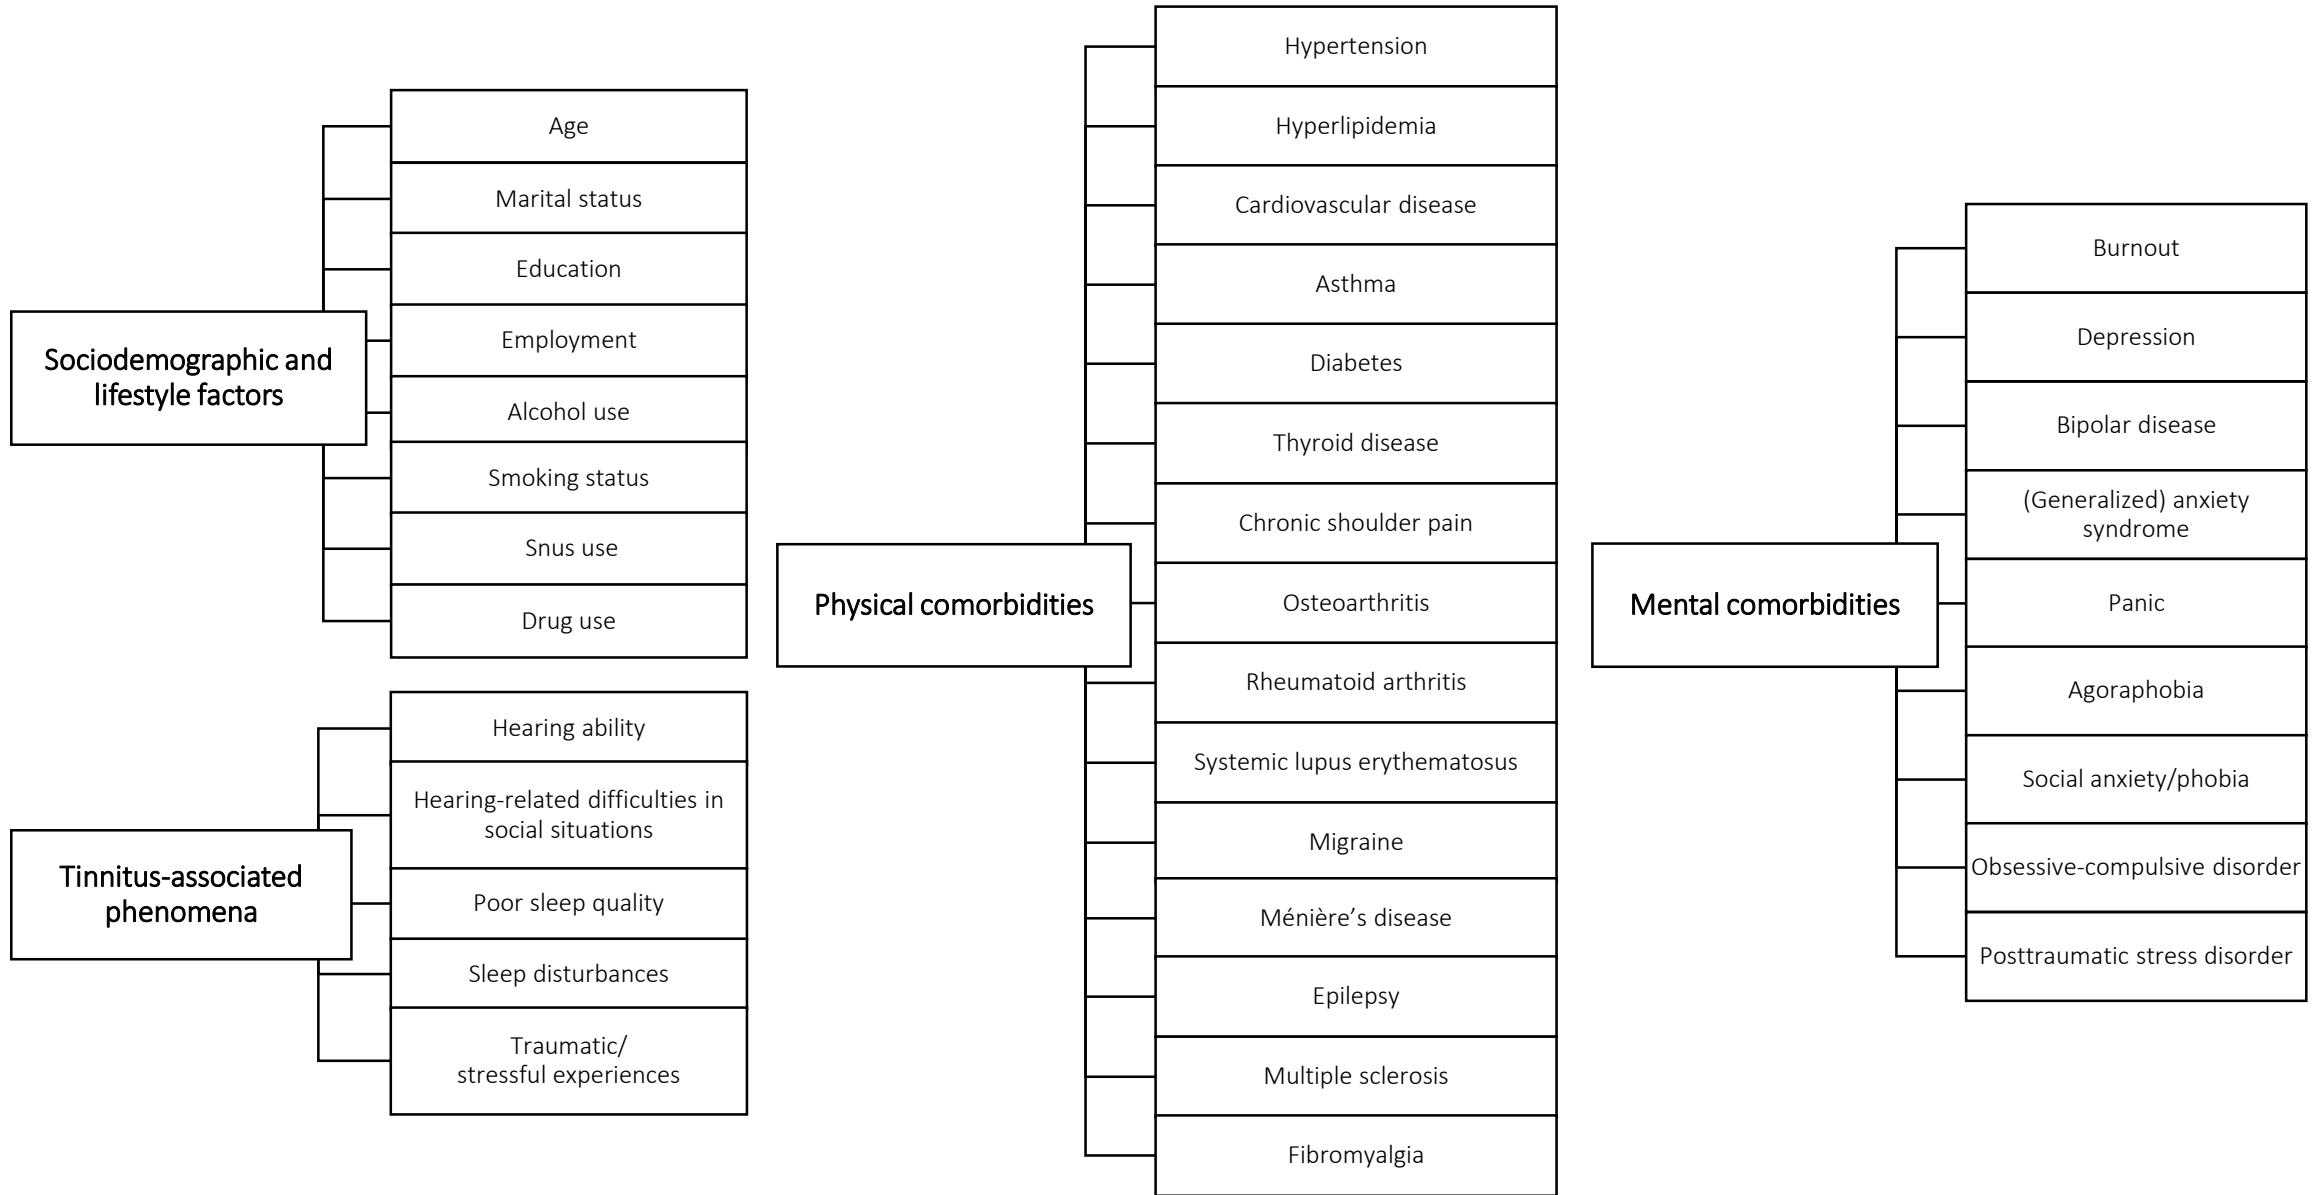

Supplement: Image_1.pdf [file Image_1.pdf]
